# Supplementary material for: Engineering of Escherichia coli Glyceraldehyde-3-Phosphate Dehydrogenase with Dual NAD+/NADP+ Cofactor Specificity for Improving Amino Acid Production
Source: MDPI journal article supplement (doi:10.3390/microorganisms10050976), 2022-05-06
Supplement: s1 [file s1]

## Supplementary Materials.

**Table S1.** Primers used in the study.

| Primers | Sequence                                                                   |
|---------|----------------------------------------------------------------------------|
| P1      | 5'atgactatcaaagtaggtatcaacggtttggccgtatcgctcaagttagtagataaaaaagct3'        |
| P2      | 5'agatgtgagcgatcagggtccagaacttggagggtgaagcctgctttttataactaag3'             |
| P3      | 5'attccgcttgacgctgcg3'                                                     |
| P4      | 5'tcttaatcatgacgcagtc3'                                                    |
| P5      | 5'ttgagtcctacgggatccgctcgtttacctgaggtaattcgctcaagttagtagataaaaaagctgaac3'  |
| P6      | 5'gtgttaatgtttgtagaatcagtcactgaagcctgctttttataactaagttggc3'                |
| P7      | 5'gccaaacttagataaaaaagcaggcttcagtgcgtgactgattctaacaaaacattaacac3'          |
| P8      | 5'caccggagctccttgcatcgctcagttgtcgtgtactgcaccaggcacagtgtcatctcaacttatttgg3' |
| P9      | 5'catcatgacggcaatcccatcatg3'                                               |
| P10     | 5'gctcttcagtatcaaattccgcctg3'                                              |
| P11     | 5'gttctgacatcgagatcggtgcaatcaacnnnctgtagacgctgattacatggcataca3'            |
| P12     | 5'tgtatgccatgtaatcagcgtctaacagnnngttgattgcaacgatctcgatgtcagaac3'           |
| P13     | 5'cataagcttttatttggagatgtgagcgatcaggt3'                                    |
| P14     | 5'catggatcctgactgattctaacaaaacattaac3'                                     |
| P15     | 5'gttgataccaaatctcacaaagactggcgcggc3'                                      |
| P16     | 5'gtgagatttggatcaacggtttctgagtagcgg3'                                      |
| P17     | 5'gttgatgttcgttctcacaaagactggcgcggc-3'                                     |
| P18     | 5'gtgagacggattatcaacggtttctgagtagcgg3'                                     |
| P19     | 5'cagaaaaccgttgatggcccg3'                                                  |
| P20     | 5'cagaaaaccgttgataccaaa3'                                                  |
| P21     | 5'cagaaaaccgttgatgttcgt3'                                                  |

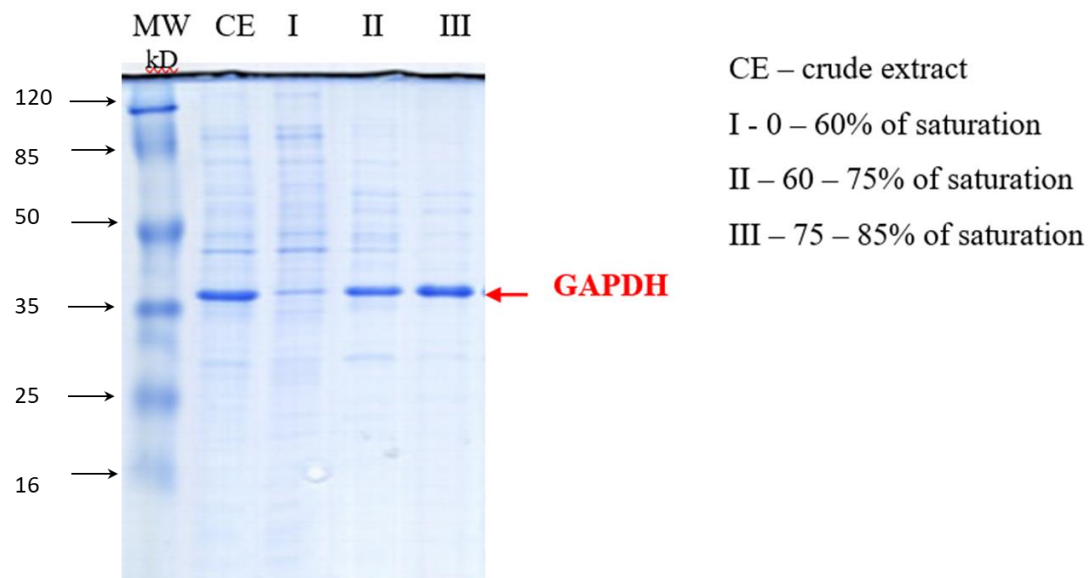

**Figure S1.** SDS-PAGE analysis of the results of fractional precipitation.

Strain YA1461- pKK-gapA<sup>wt</sup>

| Media    |         |        |         |           |           |            | OD <sub>600</sub> |
|----------|---------|--------|---------|-----------|-----------|------------|-------------------|
| LB       |         |        |         |           |           |            | 0.2±0.05          |
| M9       |         |        |         |           |           |            |                   |
| Glycerol | Glucose | Xylose | Ethanol | Succinate | Glutamate | Yeast ext. |                   |
| +        | -       | -      | -       | -         | -         | -          | 0.1±0.05          |
| +        | -       | -      | +       | +         | +         | +          | 3.5±0.20          |
| +        | -       | -      | +       | +         | +         | -          | 1.8±0.10          |
| +        | -       | -      | -       | +         | +         | +          | 1.1±0.05          |
| -        | -       | -      | +       | +         | +         | +          | 4.1±0.25          |
| +        | -       | -      | +       | -         | +         | +          | 3.9±0.20          |
| +        | -       | -      | +       | +         | -         | +          | 3.4±0.10          |
| -        | +       | -      | -       | -         | -         | -          | 0.1±0.05          |
| -        | +       | -      | +       | +         | +         | +          | 4.8±0.15          |
| -        | +       | -      | -       | +         | +         | +          | 1.2±0.10          |
| -        | +       | -      | +       | -         | -         | +          | 5.6±0.3           |
| -        | -       | +      | +       | +         | +         | +          | 4.6±0.20          |
| -        | -       | +      | -       | +         | +         | +          | 1.2±0.10          |

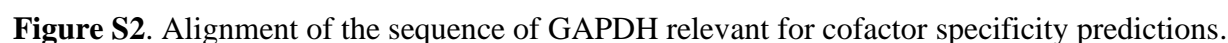

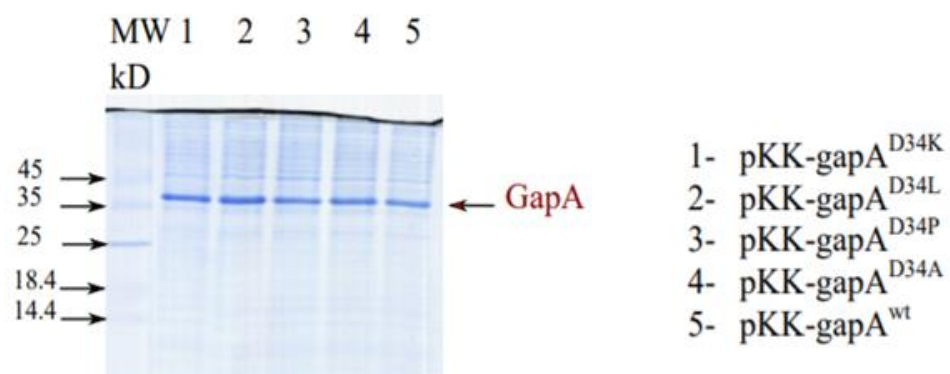

**Figure S3.** SDS-PAGE analysis of total proteins of *E. coli* plasmid-harboring strains YA1461ΔgapA::kan.
